# Supplementary material
Source: MDPI journal article supplement (https://www.mdpi.com/2673-4591/10/1/80)
Supplement: s1 [file s1]

# The Design of an Environmental Noise Labeling App for Citizen Participation in Smart Cities

Paula Garcia, Leticia Duboc and Rosa Ma Alsina-Pagès

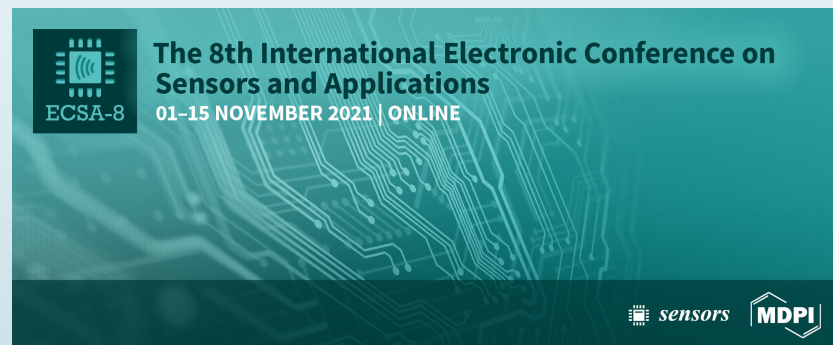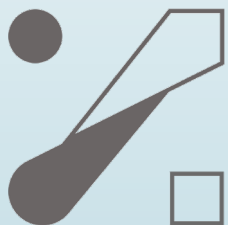

# Content

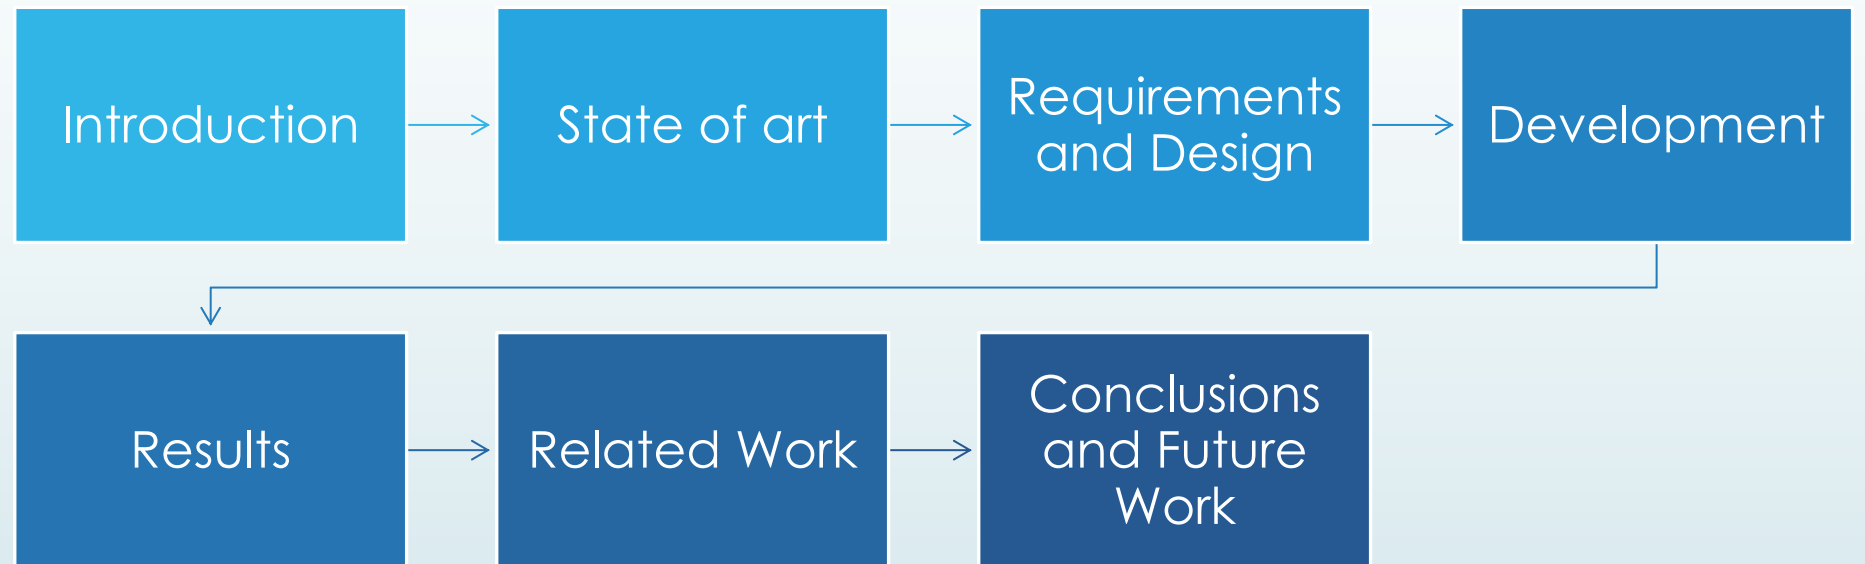

# Introduction

Great variety of sounds recognized and discerned

Collect, classify and label is a time-consuming task

Basic training to citizens to enable their participation

Using gaming and new technologies to make classification and labeling process more enjoyable

# State of art

## *Gamification*

- Techniques and game mechanics in a mobile application to engage, motivate and encourage its use
- MDA System
  - Mechanics
  - Dynamics
  - Aesthetics

## *Citizen Science*

- Scientific research carried out thanks to volunteer citizens, who contribute to science with their intellectual efforts, tools and resources

## *Labeling sounds*

- Process that consists of indicating in a recording where a specific sound is located and how it is defined
- e.g. MajorMiner, TagATune, the Listen Game

# Related Work

## MajorMiner

- Web application for tagging entire audios *offline* "against" a database

## TagATune

- Application to tag entire audios for a limited time, played in pairs or with a bot

## The Listen Game

- Application to tag entire audios playing simultaneously against multiple players

# Requirements and Design

## Mechanics:

- Points
- Ranking
- Levels

## Aesthetics

- Level change

## Dynamics

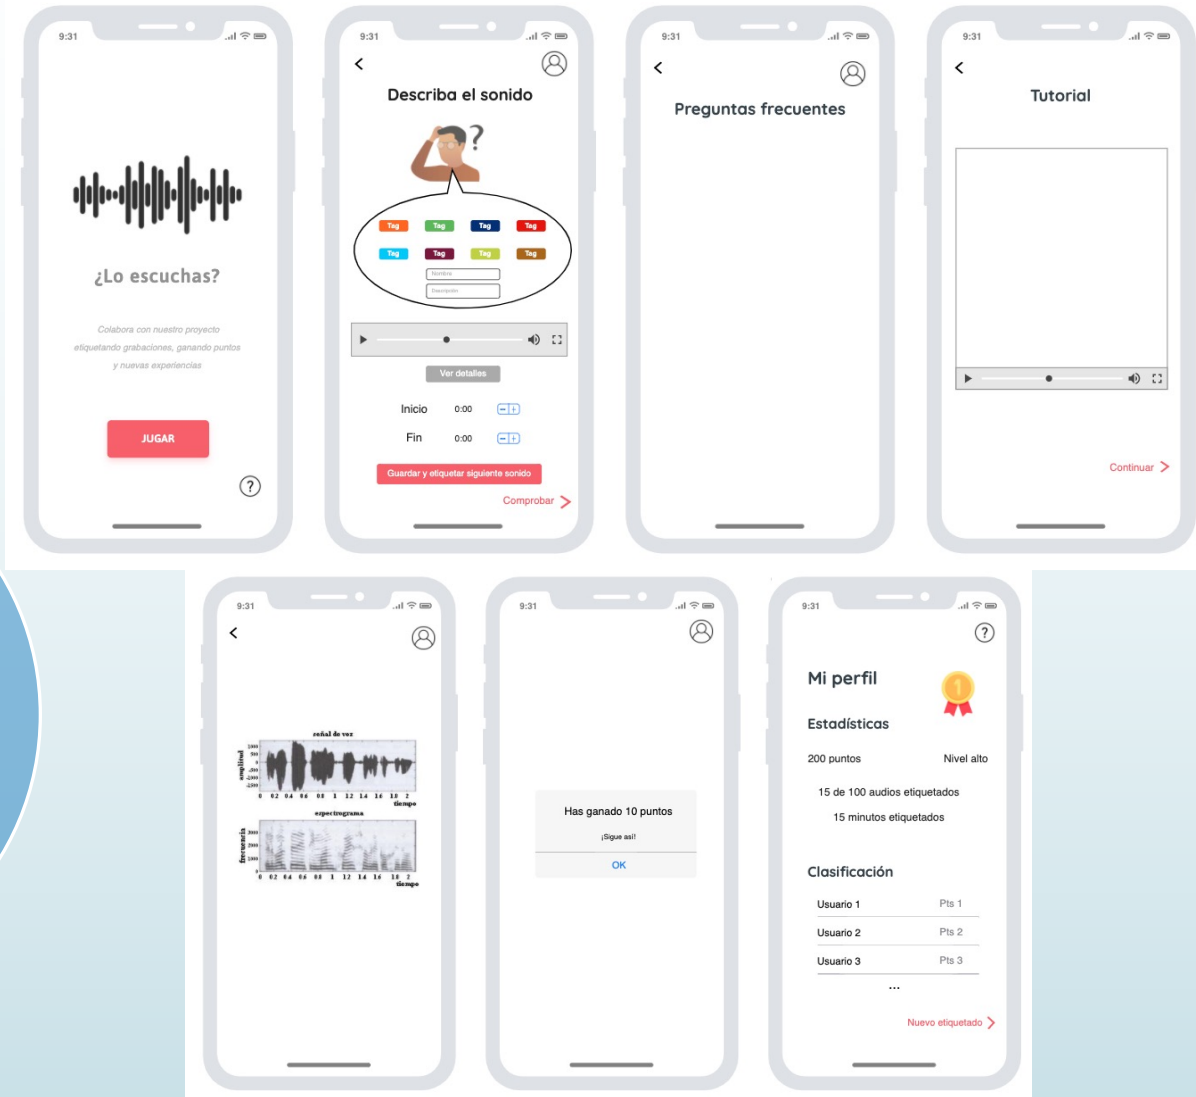

# Development

First prototype developed

Testing with 10 researchers

## Criteria

- Installation
- Labels
- Navigation
- Tutorial
- Frequently asked questions
- Operation
- Design
- General aspects

# Results

Have you been able to understand the sounds well?

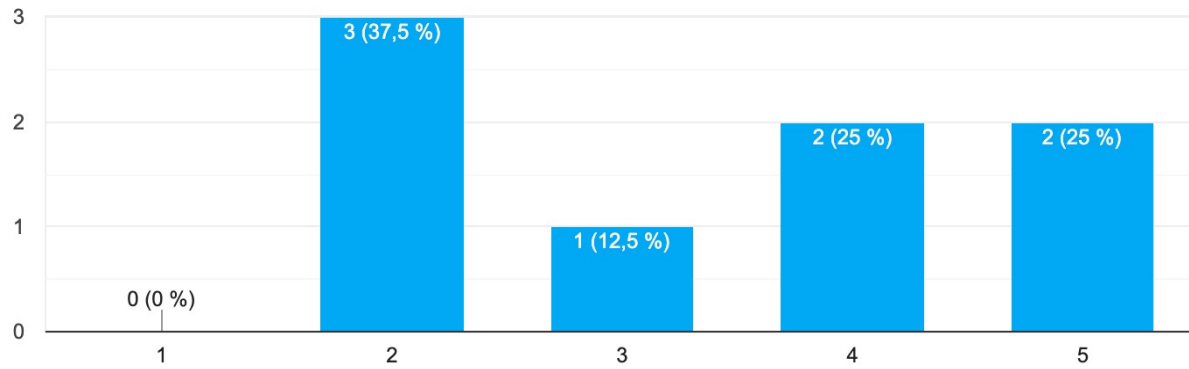

Do you consider that the labels shown represent the perceived sounds?

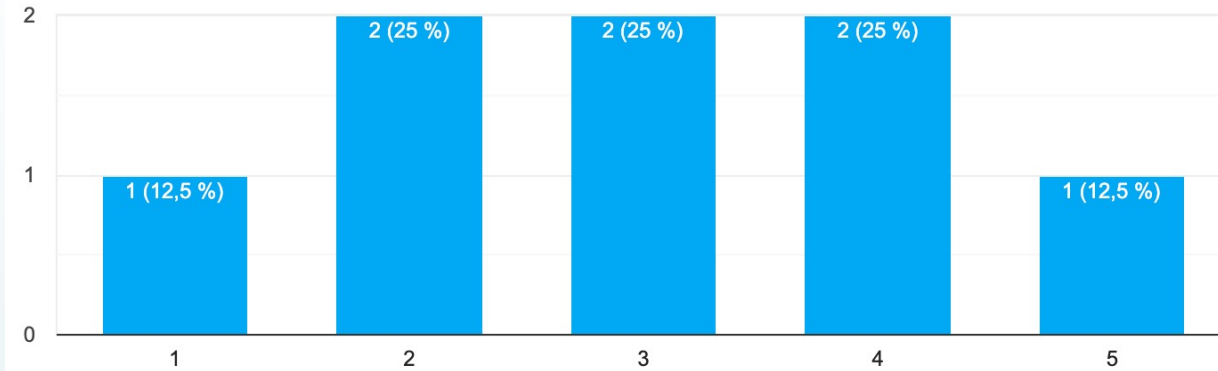

How do you rate the app in general?

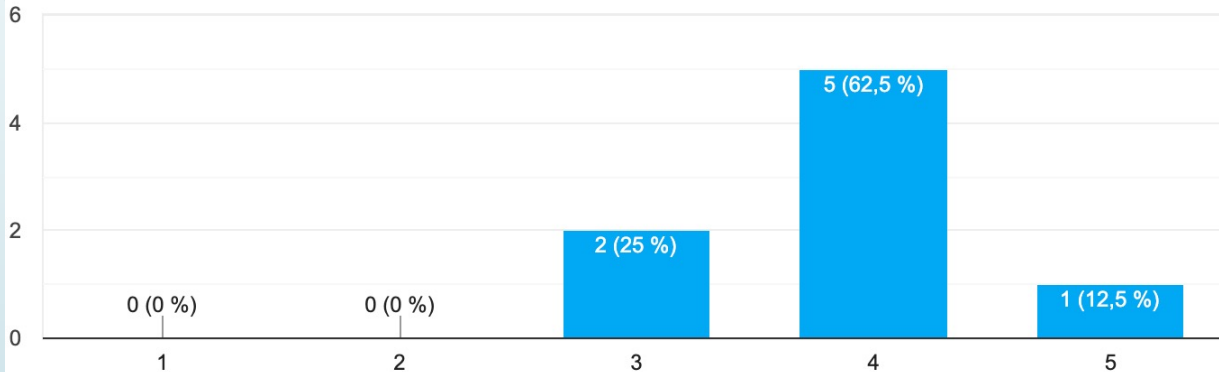

Rate the ease of use

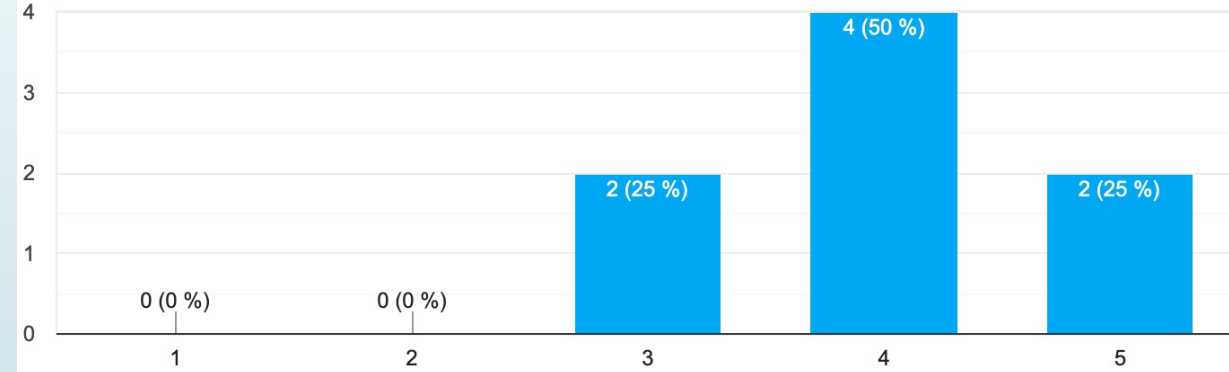



# Conclusions and Future Work

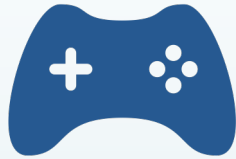

Development of a mobile application

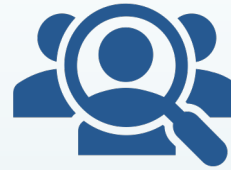

Aspects considered are gamification, citizen science and sound tagging

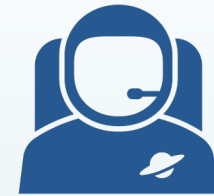

Improve the application and continue testing



Thank you for your  
attention
